# Supplementary material for: PKC isoforms activate LRRK1 kinase by phosphorylating conserved residues (Ser1064, Ser1074 and Thr1075) within the CORB GTPase domain
Source: Biochem J. 2022 Sep 23;479(18):1941–65. doi: 10.1042/BCJ20220308 (PMC9555798; doi:10.1042/BCJ20220308)
Supplement: Supplementary Material [file BCJ-479-1941-s1.pdf]

# Supplementary Section

## PKC isoforms activate LRRK1 kinase by phosphorylating conserved residues (Ser1064, Ser1074 and Thr1075) within the COR<sub>B</sub> GTPase domain

Asad U Malik<sup>1,4\*</sup>, Athanasios Karapetsas<sup>1\*</sup>, Raja S. Nirujogi<sup>1,4</sup>, Deep Chatterjee<sup>2,4</sup>, Toan K. Phung<sup>1,4</sup>, Melanie Wightman<sup>1</sup>, Robert Gourlay<sup>1</sup>, Nick Morrice<sup>3</sup>, Sebastian Mathea<sup>2,4</sup>, Stefan Knapp<sup>2,4</sup> and Dario R Alessi<sup>\*1,4</sup>

\* Authors made an equal contribution to the Study

1 Medical Research Council (MRC) Protein Phosphorylation and Ubiquitylation Unit, School of Life Sciences, University of Dundee, Dow Street, Dundee DD1 5EH, United Kingdom.

2 Structural Genomics Consortium, Buchmann Institute for Molecular Life Sciences and Institute for Pharmaceutical Chemistry, Johann Wolfgang Goethe-University, Max-von-Laue-Str. 9, D-60438 Frankfurt am Main, Germany

3 AB Sciex, Alderley Park, Macclesfield SK10 4TG, United Kingdom

4 Aligning Science Across Parkinson's (ASAP) Collaborative Research Network, Chevy Chase, MD, 20815.

\*Correspondence to Dario R Alessi ([d.r.alessi@dundee.ac.uk](mailto:d.r.alessi@dundee.ac.uk))

### Figure 1: Quantification of time course of PMA treatment in HEK293 Flp-In T-Rex cells.

Quantified immunoblotting data from Figure 1C are presented as ratios of pRab7ASer72/total Rab7A and total PKC $\alpha$ /tubulin (mean  $\pm$  SEM).

**Figure 2: PKC $\alpha$  stoichiometrically phosphorylates LRRK1.** The indicated concentrations of PKC $\alpha$  (0-100 nM) was incubated with recombinant wild type (WT) insect cell expressed recombinant (r) LRRK1[20-2015] (50 nM) in the presence of Mg[ $\gamma$ -<sup>32</sup>P]ATP (500 cpm/pmol). Each sample is analysed in quadruplicate. Reactions were terminated after 30 min with SDS-sample buffer. 80% of each reaction was resolved by SDS-polyacrylamide electrophoresis, stained by Coomassie blue (upper panel), and subjected to autoradiography (middle panel). Dried bands were then excised from the gel and counts per minute were evaluated using a scintillation counter to determine stoichiometry of LRRK1 phosphorylation. Data is presented mean  $\pm$  SEM.

**Figure 3. Time-course and dose-dependence of activation of recombinant insect LRRK1 by PKC $\alpha$ .** (A) Step-1 of the LRRK1 kinase activation assay was setup with insect cell produced recombinant wild type (WT) LRRK1[20-2015], the indicated concentrations of PKC $\alpha$ ,  $\pm$  PKC inhibitor GÖ6983 (10  $\mu$ M) in the presence of non-radioactive MgATP for 30 min. PKC phosphorylated LRRK1 was then diluted 1.5-fold into a kinase assay containing recombinant Rab7A (1 mM) in the presence of non-radioactive MgATP (Step 2). Reactions were terminated after 30 min with SDS-sample buffer and subjected to a multiplexed

immunoblot analysis using the LI-COR Odyssey CLx Western Blot imaging system with the indicated antibodies. Combined immunoblotting data from 2 independent biological replicates (each performed in duplicate) are shown. Lower panel quantified immunoblotting data are presented as ratios of pRab7ASer72/total Rab7A (mean  $\pm$  SEM) relative to levels observed with no PKC $\alpha$  added (give a value of 1.0). **(B)** As in **(A)** except in step 1 of the kinase activity assay 100 nM PKC $\alpha$  was incubated with immunoprecipitated GFP-LRRK1 for the times indicated.

**SFigure 4: Recombinant PKC Alpha further activates PMA-stimulated LRRK1.** HEK293 Flp-In T-REx cells stably expressing wild type (WT) GFP-LRRK1 were treated  $\pm$  1  $\mu$ g/ml doxycycline for 24 h to induce GFP-LRRK1 expression. Cells were serum-starved for 16 h and stimulated  $\pm$  160 nM phorbol 12-myristate 13-acetate (PMA) for 30 min and lysed. GFP-LRRK1 immunoprecipitated and aliquoted as indicated. Each aliquot contains GFP-LRRK1 immunoprecipitated from 1 mg of HEK293 cell lysate. Step-1 of the LRRK1 kinase activation assay was setup by incubating GFP-LRRK1 aliquots with PKC $\alpha$  (100 nM) in the presence of non-radioactive MgATP for 30 min. PKC phosphorylated LRRK1 was then diluted 1.5-fold into a kinase assay containing recombinant Rab7A (1 mM) in the presence of non-radioactive MgATP (Step 2 of the kinase assay). Reactions were terminated after 30 min with SDS-sample buffer analysed by multiplexed immunoblot analysis using the LI-COR Odyssey CLx Western Blot imaging system with the indicated antibodies (upper panel). Combined immunoblotting data from 2 independent biological replicates (each performed in duplicate) are shown. Lower panel quantified immunoblotting data are presented as ratios of pRab7ASer72/total Rab7A (mean  $\pm$  SEM) relative to levels observed with no PKC $\alpha$  added (given a value of 1.0).

**SFigure 5. Heatmap of phosphorylation sites identified via HCD analysis.**

Kinase inactive LRRK1[D1409A, 20-2015] (200 nM) was incubated  $\pm$  PKC $\alpha$  (400 nM) the presence of MgATP. Reactions were terminated after 30 min with SDS-sample buffer and reactions resolved by SDS-polyacrylamide electrophoresis and gel stained by Coomassie blue. The gel bands containing LRRK1 were digested with mixture of AspN, Chymotrypsin and Trypsin+Lys-C. The resultant peptides were analyzed by HCD fragmentation acquired on Orbitrap Exploris 240 MS platform. The high confidence phosphosites that are identified and analyzed using MaxQuant are depicted as a heatmap representing the relative abundance of identified phosphosites versus protease utilized  $\pm$  PKC $\alpha$ . The grey color denotes no phosphopeptides detected. Side panel show the evolutionary conservation score from 1 (least conserved) to 9 (most conserved) of each of the identified phosphorylation sites determined calculated the Consurf server (<https://consurf.tau.ac.il/>) [52]. Sequences of LRRK1 homologs were obtained from OrthoDB (<https://www.orthodb.org/>) [53] and alignment of sequences was performed using the MAFFT server (<https://www.ebi.ac.uk/Tools/msa/mafft/>) [54]. Phosphosites Thr1061 and Ser1064 and their respective conservation scores are highlighted in red.

**SFigure 6. Membrane-fraction of LRRK1 colocalizes with plasma membrane marker Na-K ATPase. (Left panel)** HEK293 Flp-In T-REx cells stably expressing wild type (WT) GFP-LRRK1 were treated with 1  $\mu$ g/ml doxycycline for 24 h to induce GFP-LRRK1 expression. Cells were serum-starved for 16 h and stimulated  $\pm$  160 nM phorbol 12-myristate 13-acetate (PMA) for 30 min. Cells were permeabilized by liquid nitrogen freeze–thaw to deplete cytosol [48] and

then fixed and stained with mouse anti-Na-K ATPase, chicken anti-GFP and DAPI. **(Right panel)** Co-localization of GFP-LRRK1 and Na-K ATPase was determined from a Mander's coefficient (presented as mean  $\pm$  SEM) after automatic thresholding.  $P = 0.6425$  (ns) by Student's unpaired, two-tailed t test.

**SFigure 7. Triple Ser1064, Ser1074 and Thr1075 alanine or glutamate mutations do not affect LRRK1 localization.** (Left panel) HEK293 cells were grown on cover slips and transiently transfected with plasmids encoding GFP-LRRK1 wild type (WT) or the indicated mutants of GFP-LRRK1. Cells were serum-starved for 16 h and stimulated  $\pm$  160 nM phorbol 12-myristate 13-acetate (PMA) for 30 min. Cells were permeabilized by liquid nitrogen freeze-thaw to deplete cytosol [46] and then fixed and stained with mouse anti-PKC $\alpha$ , chicken anti-GFP and DAPI. (Right panel) Co-localization of GFP-LRRK1 and PKC $\alpha$ , was determined from a Mander's coefficient (presented as mean  $\pm$  SEM) after automatic thresholding.  $P > 0.05$  (ns) by Student's unpaired, two-tailed t test.

SFigure 1

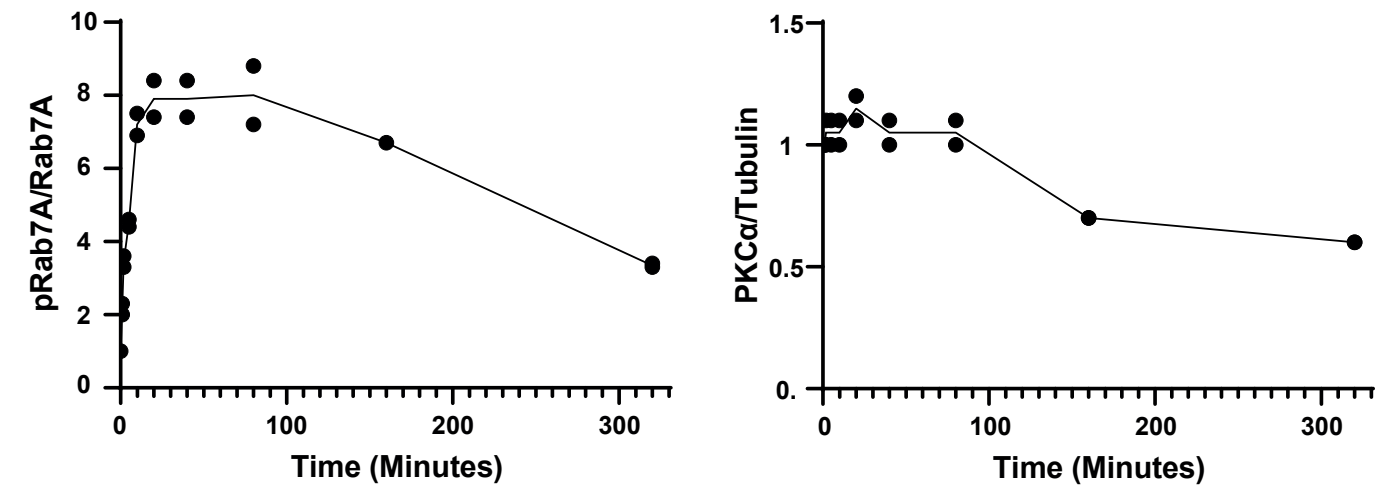

SFigure 2

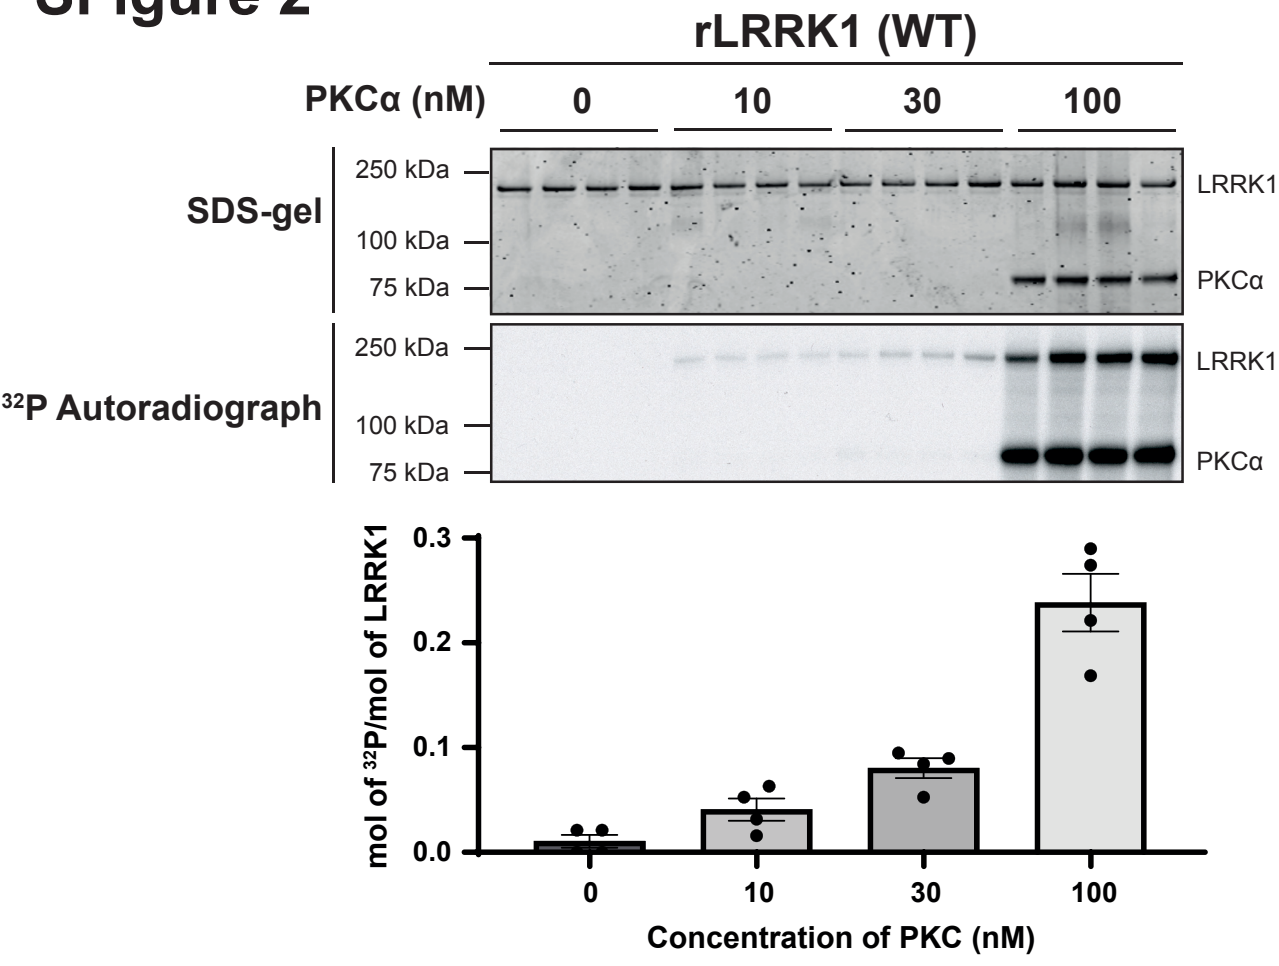

**A)**

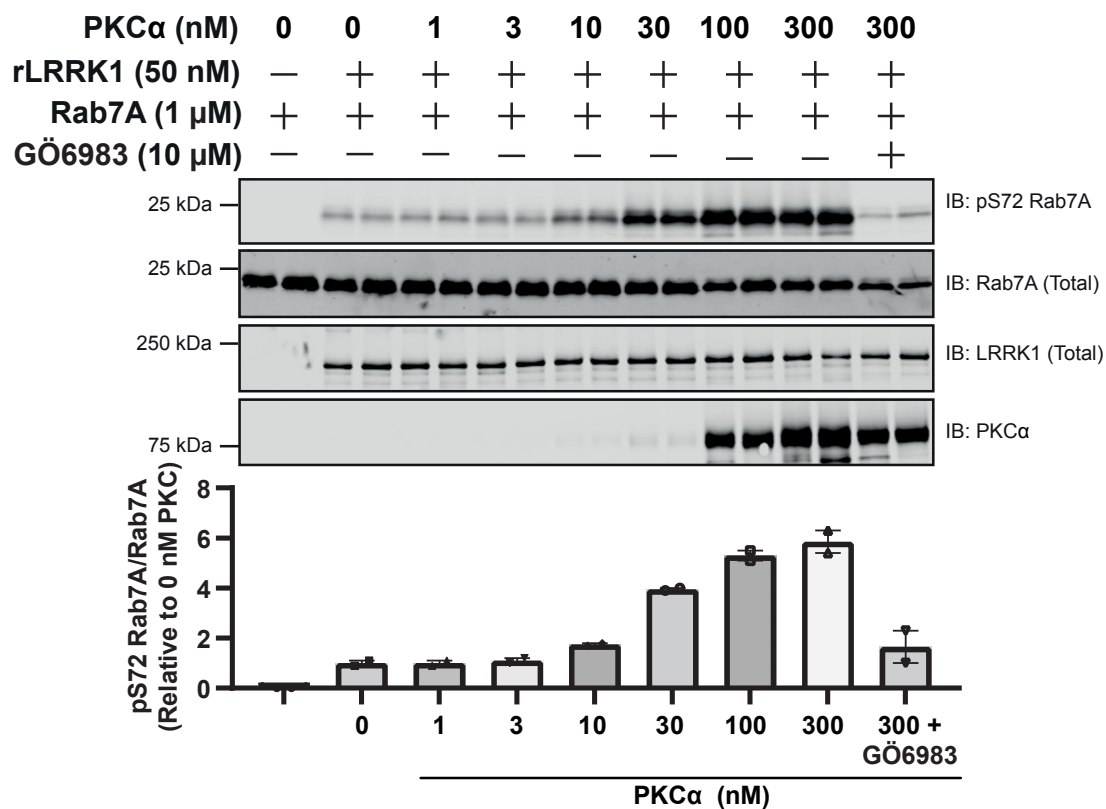

**B)**

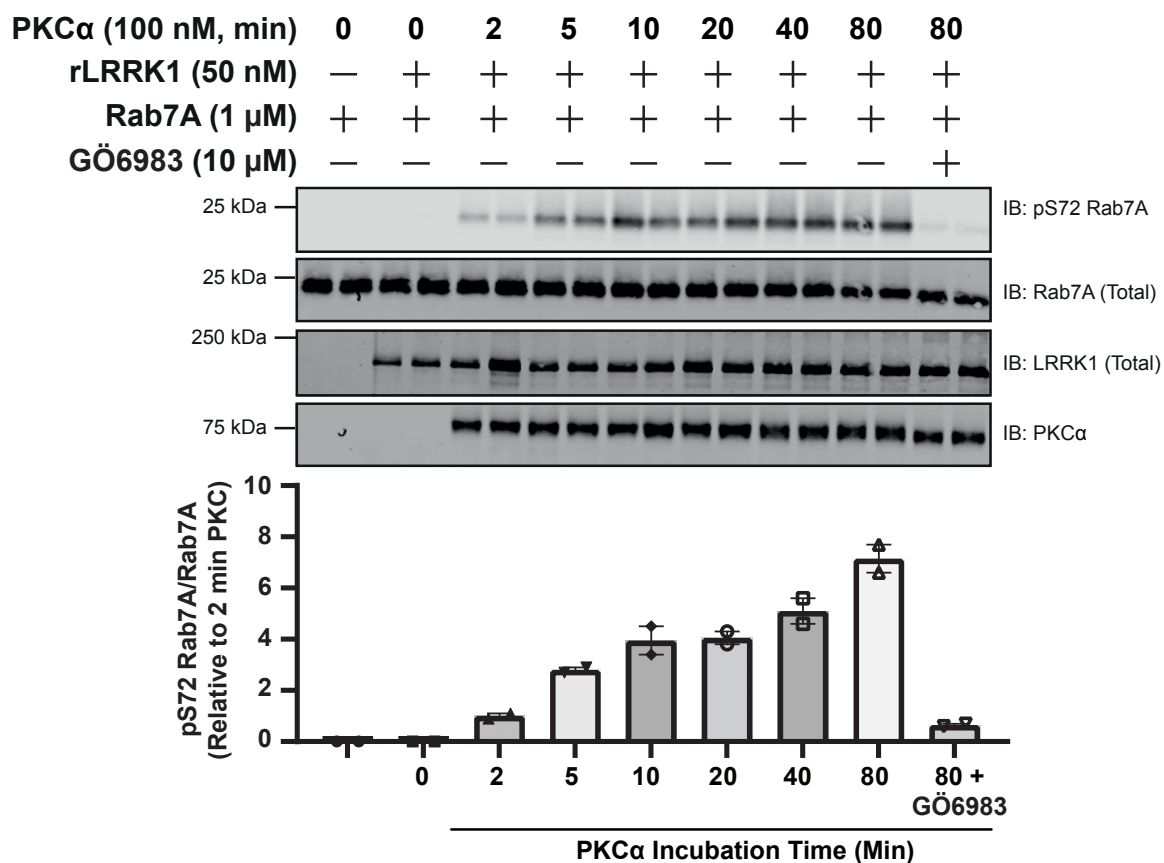

**SFigure 3**

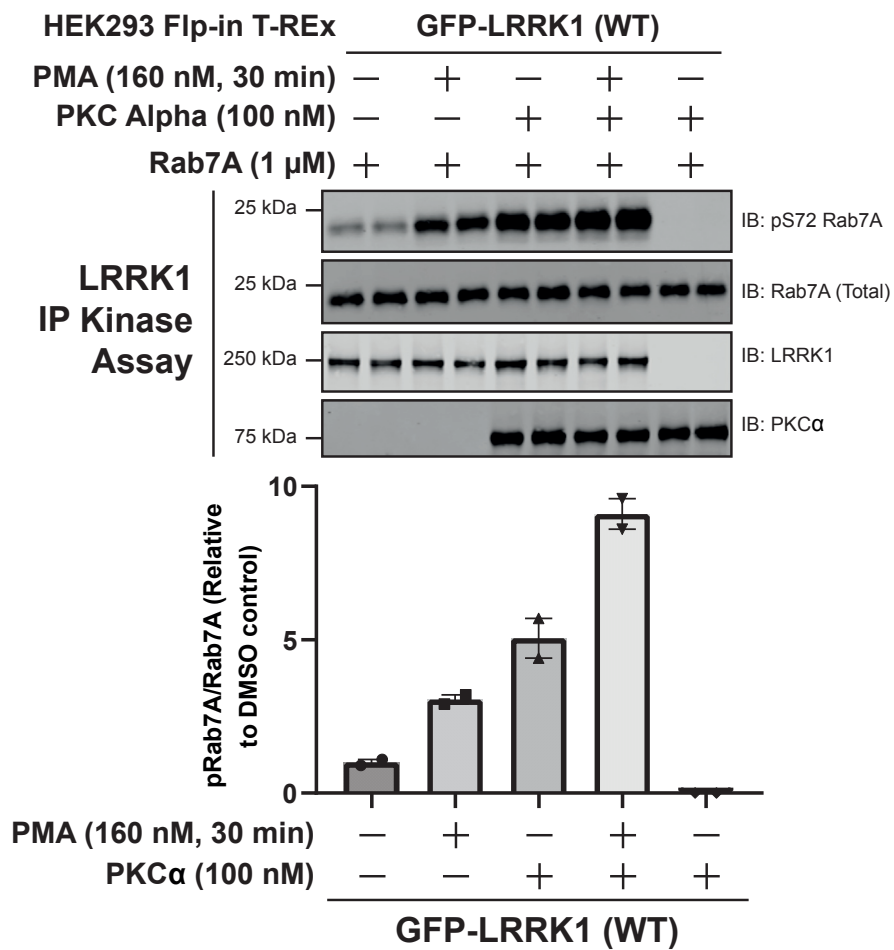

**SFigure 4**

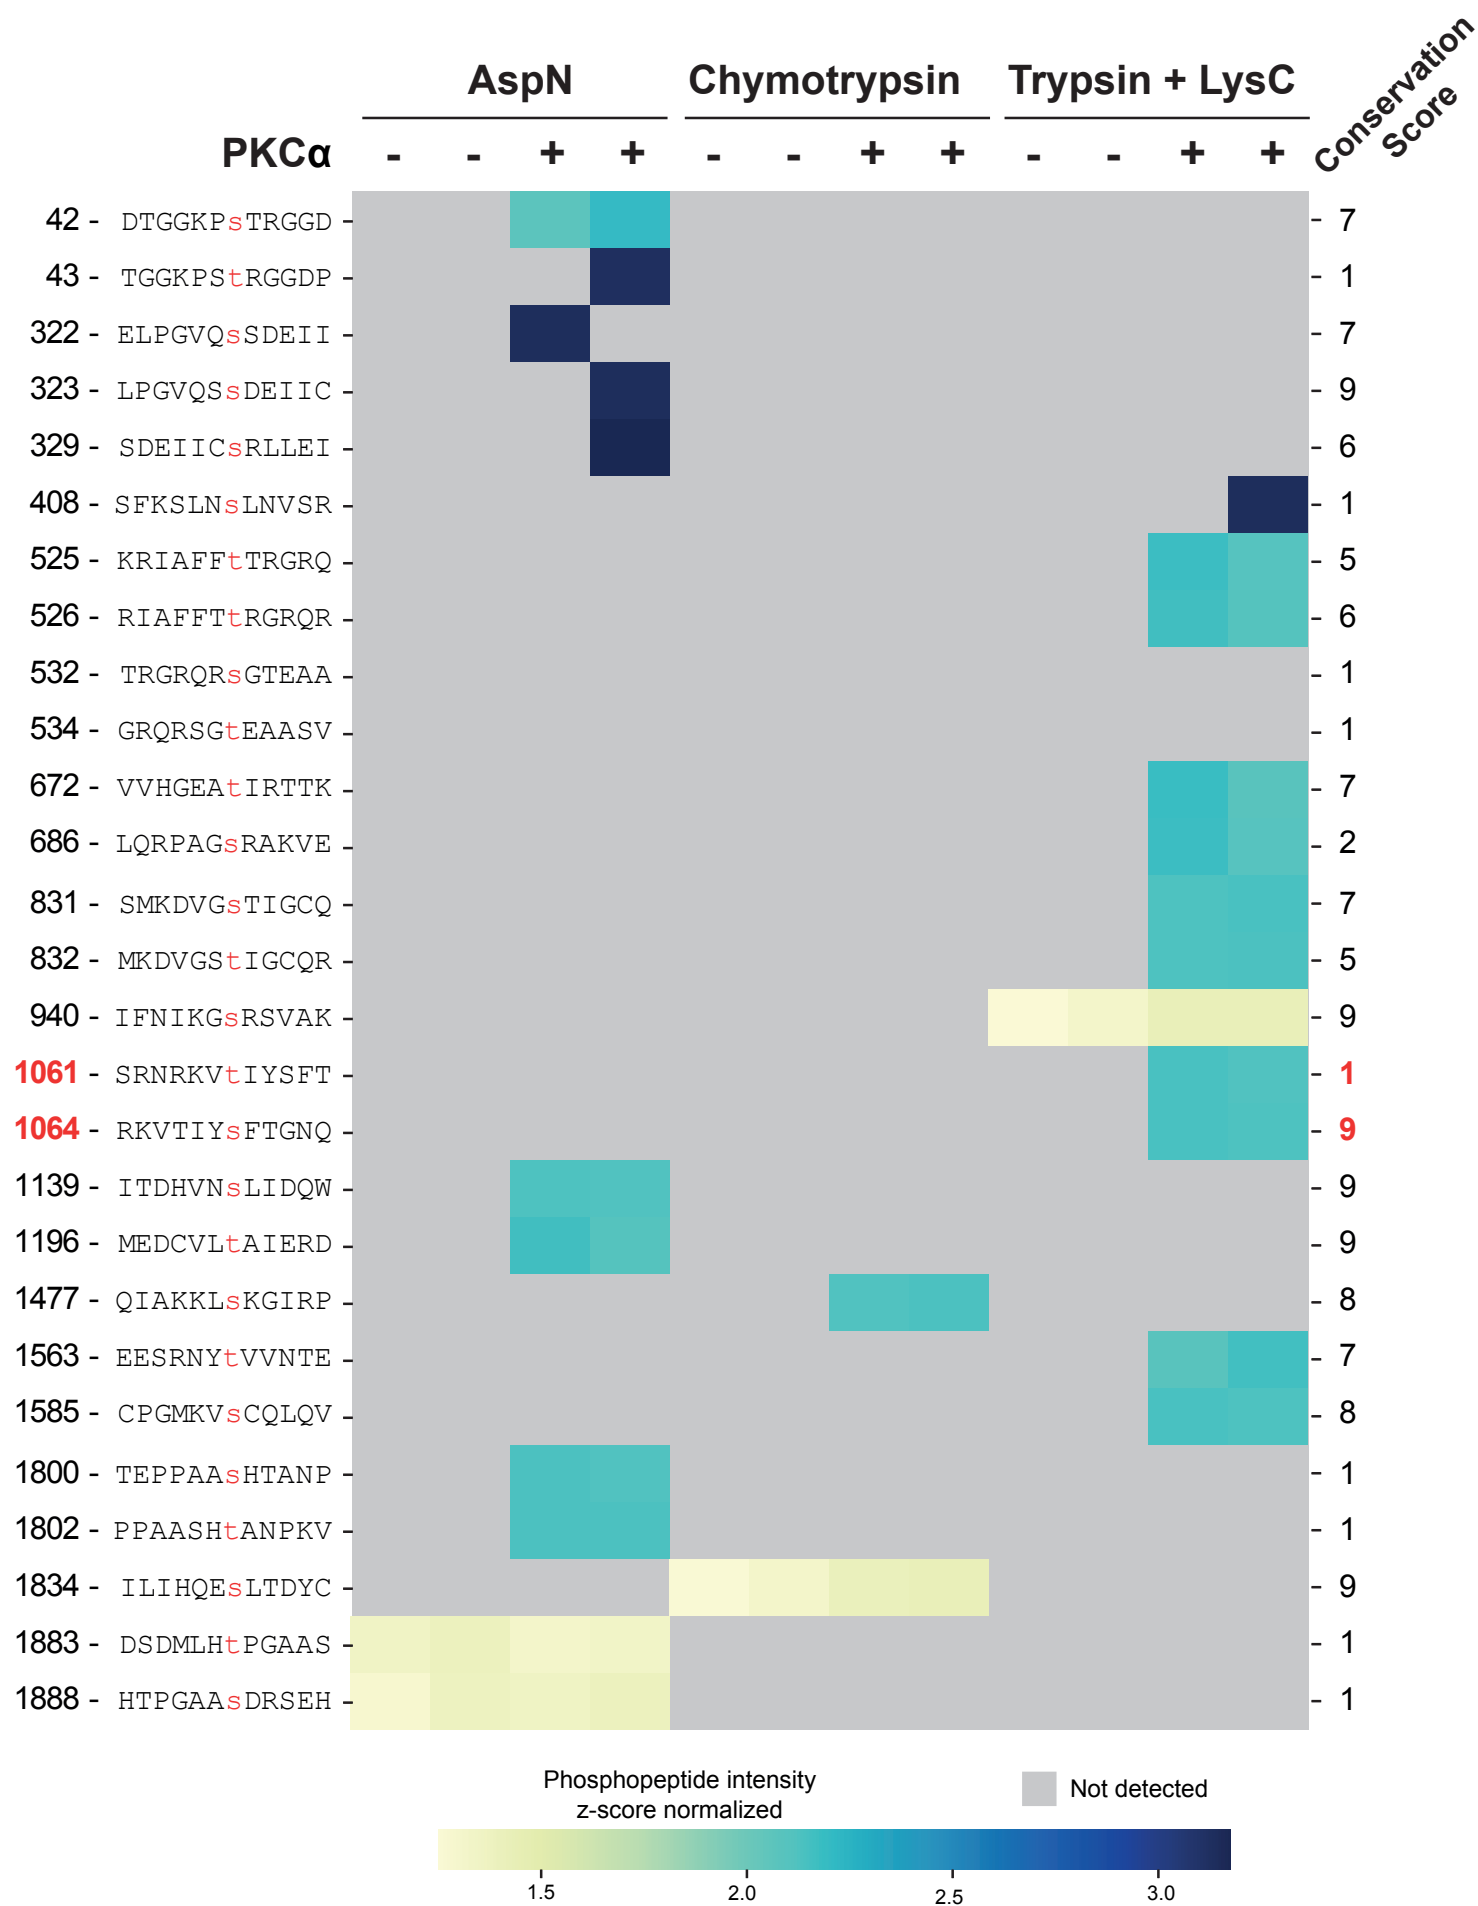

**SFigure 5**

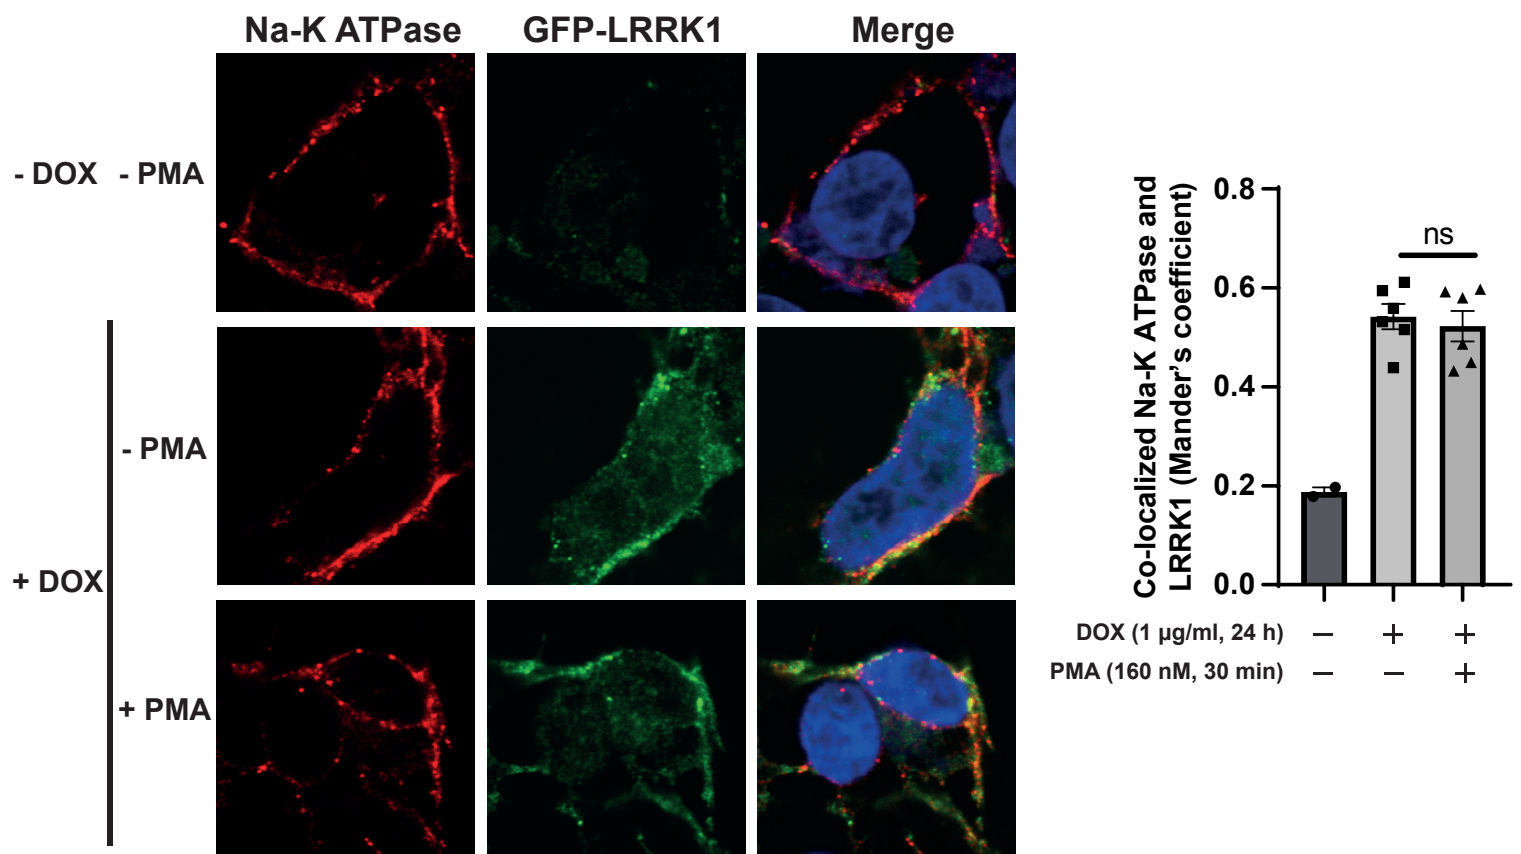

**SFigure 6**

# GFP-LRRK1

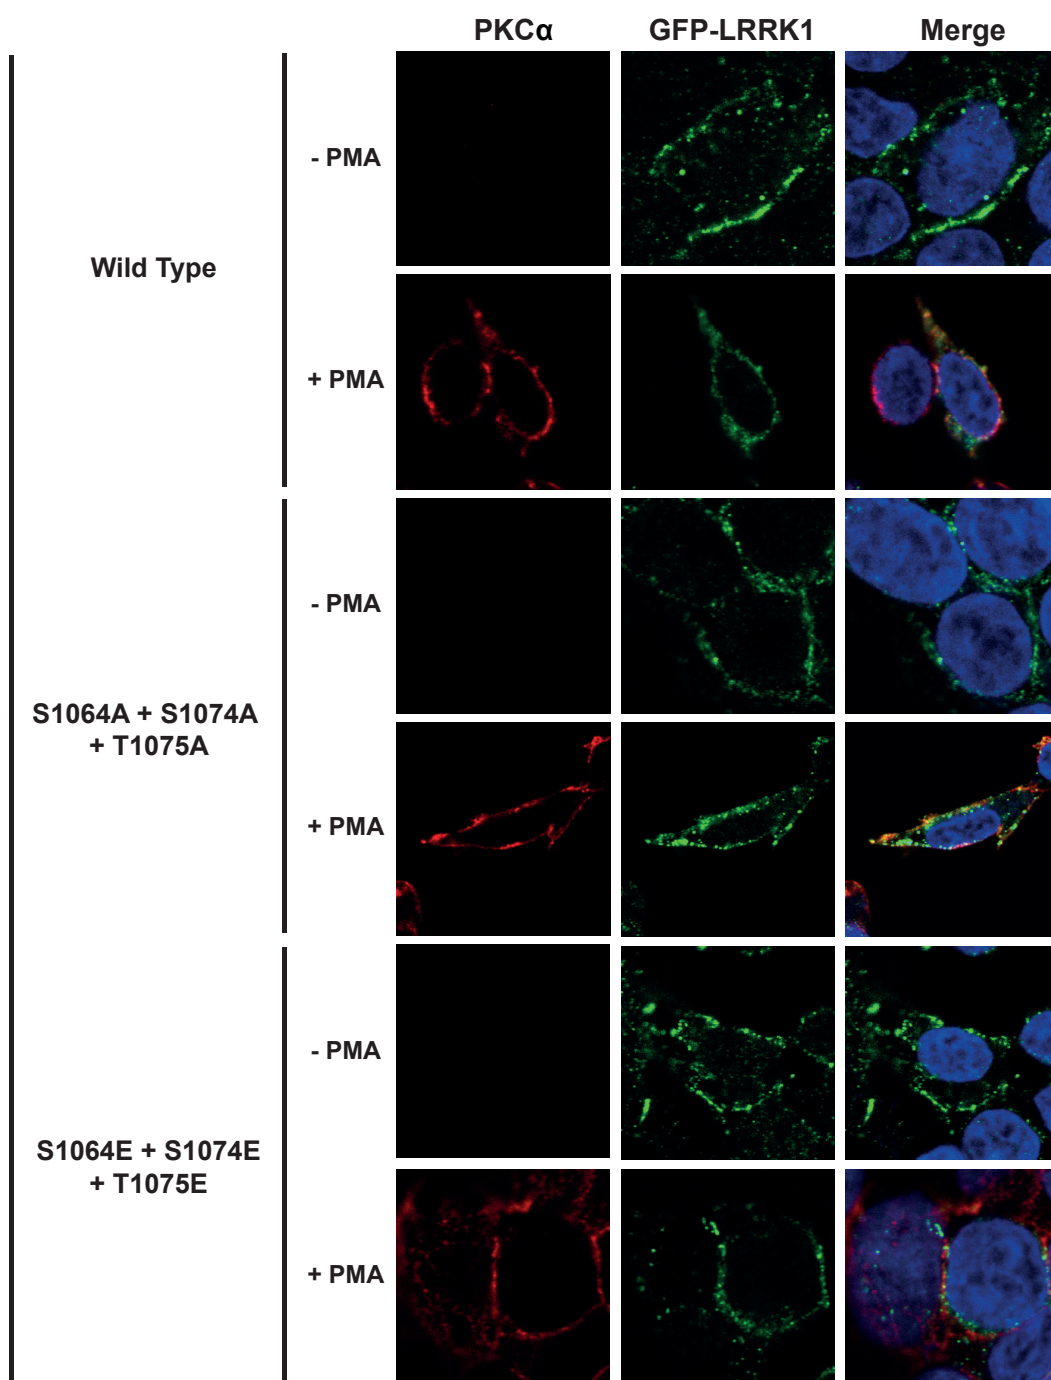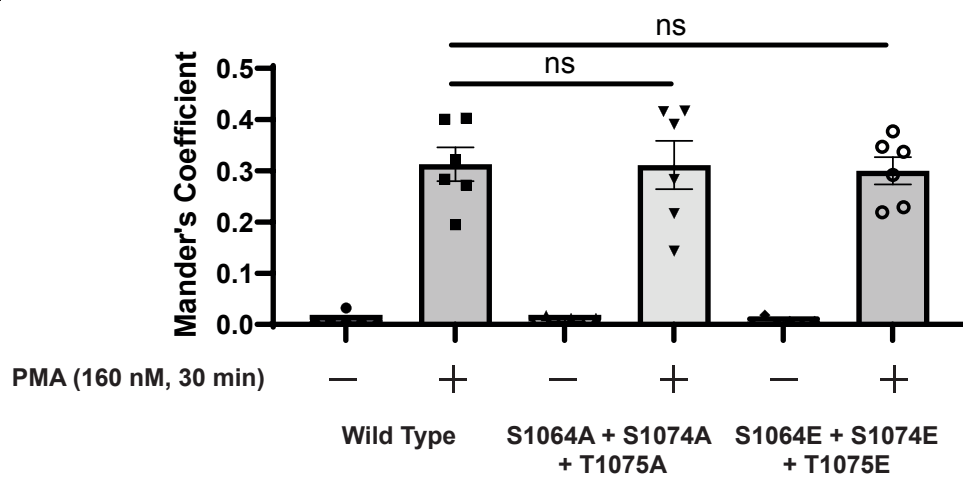

**SFigure 7**
